# Supplementary material for: Influence of cloud microphysics schemes on weather model predictions of heavy precipitation
Source: Copernicus journal article supplement (doi:10.5194/acp-23-6255-2023), 2023-06-07
Supplement: Supplementary file [file acp-23-6255-2023-supplement-title-page.pdf › acp-23-6255-2023-supplement-title-page.pdf]

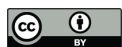

*Supplement of*

## **Influence of cloud microphysics schemes on weather model predictions of heavy precipitation**

**Gregor Köcher et al.**

*Correspondence to:* Gregor Köcher ([gregor.koecher@physik.uni-muenchen.de](mailto:gregor.koecher@physik.uni-muenchen.de))

- [acp-23-6255-2023-supplement-title-page.pdf](#)
- [fig06.pdf](#)

The copyright of individual parts of the supplement might differ from the article licence.
