# Supplementary figures and images for: Influence of cloud microphysics schemes on weather model predictions of heavy precipitation
Source: Copernicus journal article supplement (doi:10.5194/acp-23-6255-2023), 2023-06-07

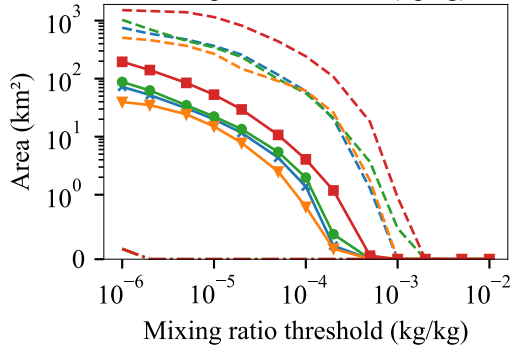

Supplement: Supplementary file 1 [file fig06.pdf › fig06.pdf]
